# Supplementary material
Source: publisher figshare collection journal article supplement (https://geolsoc.figshare.com/ndownloader/files/28010210)
Supplement: Supplementary file 1 [file 28010210]

## Sheet: Permian
Table S4a. Major and trace elements of the Permian granitic rocks in Phan Si Pan - Tu Le region, NW Vietnam
Sample	Muong Hum granites							Nam Xe - Tam Duong granites						Phu Sa Phin granites				Tu Le rhyolites
	PSP2b	PSP2c	PSP2d	PSP2f	PSP2g	MH-32		PSP27	PSP28a	PSP28b	PSP28c	PSP28d		PSP31	PSP32	FSP-01		PSP24	PSP29a	PSP29b	PSP30
SiO2 (wt%)	73.0017	72.5137	71.61	71.6928	71.752	81.005		66.0262	68.1158	66.9024	67.184	69.9181		76.0874	76.7552	77.365		76.2728	70.6324	69.4955	73.6062
TiO2	0.288738	0.404368	0.392496	0.384538	0.400236	0.2		0.787667	0.648741	0.689358	0.707419	0.579906		0.199182	0.244446	0.324		0.266466	0.51829	0.494407	0.317904
Al2O3	13.0681	13.8653	14.0969	14.3787	13.7258	10.706		14.4101	14.835	14.4854	14.1097	13.6283		12.0126	10.9522	10.857		11.5604	13.3852	13.3107	12.6095
Fe2O3	2.85041	2.87151	3.17892	2.86755	3.19689	2.329		5.93032	4.53822	5.58321	5.69205	4.96364		2.28461	3.55595	3.883		2.75911	4.1632	3.74336	3.93742
MnO	0.053951	0.0599064	0.0549295	0.0649219	0.0519009	0.025		0.0684497	0.0336238	0.0495228	0.0961059	0.157702		0.0736972	0.0558735	0.071		0.0278397	0.138012	0.12164	0.0139519
MgO	0.361671	0.451295	0.441433	0.500398	0.430178	0.284		1.01484	0.38964	0.805241	0.718317	0.49806		0.0806686	0.0429029	0.097		0.192889	0.281982	0.245241	0.119588
CaO	0.119891	0.231638	0.20274	0.189772	0.334361	0.062		0.97516	0.831693	0.788404	1.10571	1.06699		0.481024	0.202541	0.3		0.226695	0.899561	2.113	0.0139519
Na2O	3.47384	4.65772	4.19262	4.43167	3.99737	2.341		5.19424	6.04535	5.47029	5.33834	4.86482		4.17286	3.79441	4.072		2.99078	4.73709	3.89149	2.14261
K2O	6.4941	5.14995	6.24598	5.87194	6.04146	5.322		4.85893	3.68971	4.41645	4.32774	4.38972		4.77936	4.66544	4.46		5.20702	5.05085	5.05884	7.25897
P2O5	0.0299728	0.0389392	0.0419461	0.0369556	0.0439161	0.001		0.179556	0.121639	0.144607	0.1397	0.0998117		0.00697136	0.00199548	0.001		0.00497137	0.0784385	0.0784772	0.0199313
LOI	0.0906156	0.156644	0.129022	0.12077	0.190941	0.382706		0.799546	1.11061	0.957098	0.924905	0.188962		0.411593	0.227055	1.33111		0.572988	0.714969	1.9123	0.344974
TOTAL	99.833	100.401	100.587	100.54	100.165	102.658		100.245	100.36	100.292	100.344	100.356		100.59	100.498	102.761		100.082	100.6	100.465	100.385
ASI	1.01096	1.01865	1.00861	1.03093	1.00401	1.10104		0.938018	0.969259	0.963136	0.921628	0.935038		0.930889	0.939442	0.899437		1.05452	0.904292	0.85185	1.10768
(Na+K)/Al	0.975227	0.954685	0.968885	0.949088	0.955551	0.897814		0.957981	0.939616	0.951288	0.954427	0.935908		1.00213	1.03105	1.06168		0.913157	0.990672	0.892354	0.902675
K2O/Na2O	1.86943	1.10568	1.48976	1.32499	1.51136	2.27339		0.935447	0.610339	0.807351	0.81069	0.902339		1.14535	1.22956	1.09528		1.74102	1.06623	1.29997	3.38791
Fe*	0.876414	0.851307	0.866306	0.837566	0.869909	0.880654		0.840206	0.912893	0.861856	0.877001	0.899672		0.96224	0.986769	0.972987		0.927906	0.929995	0.932132	0.967348
Eu/Eu*	0.288483	0.39	0.41	0.45	0.42	0.117267		0.77	0.66	0.7	0.69	0.51		0.22	0.18	0.177592		0.0970998	0.41	0.47	0.238993
Ba/Ba*	0.44	0.64	0.61	0.91	2.72	0.09		2.54	4.09	2.12	2.36	1.58		0.18	0.02	0.02		0.15	1.34	1.07	0.42
Na2O+K2O	9.96794	9.80767	10.4386	10.3036	10.0388	7.663		10.0532	9.73506	9.88674	9.66608	9.25454		8.95222	8.45984	8.532		8.1978	9.78794	8.95033	9.40158
P	213	233	128	243	246	72		850	605	719	554	558		185	170	53		175	441	305	196
Sc	13.2	14.6	14.6	20.3	16.7	8.6		24.2	0	23.7	16.9	17.2		25.1	27	20.2		22	4.3	8.9	0
Ti	1752	2083	2162	2270	4272	1285		4944	3920	4181	4436	3686		1103	1380	1758		1534	2786	2755	1712
V	0.73	0.96	N/A	1.38	4.23	N/A		4.95	3.66	2.34	1.77	2.08		0	0	N/A		0.15	0.46	N/A	0
Cr	3	57	21	2	2	27		8	16	10	N/A	13		8	8	26		11	10	N/A	8
Mn	458	413	434	531	444	207		525	251	367	738	1173		536	431	479		221	999	955	101
Co	12.7	11.3	11.7	10.2	12.7	0.5		12.7	11.8	12.1	13.1	17		21	15.9	0.3		18.2	14.6	12	13
Ni	0.002585	119.8	49.37	-0.05866	1.313	6.96		9.298	7.156	12.02	-0.3035	7.257		11.45	12.83	7.569		9.338	10.71	-0.004841	7.963
Cu	10.16	6.89	7.55	8.61	15.69	5.54		2.65	4.91	2.72	7.3	7.35		1.62	0	2.93		31.59	4.2	6.22	4
Zn	55.3	190.9	105.8	57.3	87.2	57		42.3	25.4	61.2	23.6	115.3		73.5	178.9	303.2		15.4	136.3	27.9	7.2
Ga	33.1	28.6	31.5	32.7	33.6	28.9		29.4	29.7	29.9	30.8	32.2		30.7	34	30.2		33.1	30.2	30.3	29.3
Rb	237.5	195.3	216.3	185.7	222.7	223.2		143.2	70.09	113.6	107.6	104.2		183.1	221.9	184.6		208.9	126.1	127.9	172.7
Sr	40	26	27	40	52	19		163	65	129	146	107		7	3	12		46	43	63	30
Y	127.2	67.7	70.6	70.3	84.8	68.7		63.6	22.2	62.2	68.3	80.9		70.8	118.2	144.8		101.8	51.4	68.5	52.1
Zr	1036	801	790	766	863	868		585	651	637	708	845		759	1234	1338		1081	812	780	862
Nb	148.7	123.6	118.1	116.4	121.8	160.2		99.2	91.4	94.4	107.5	118.9		109.1	188.9	208.2		171.6	112.8	114.1	115
Cs	2.291	1.967	1.664	1.478	2.048	1.966		2.136	0.1728	1.275	1.142	0.8469		0.5152	0.2274	0.1267		1.149	0.8142	0.4605	0.8503
Ba	412	379	364	516	1811	66		1121	427	869	930	718		97	18	14		99	367	486	157
La	115.5	124.2	100.2	107.2	111.2	115.8		107.3	53.2	128.3	91.3	111.4		104.2	170.3	204.7		164.4	95.1	98.3	127.1
Ce	233.6	243.9	184.7	205.4	225.6	214.5		222.7	181.1	258.6	176.1	243.9		222.3	334.5	377.7		325.2	244.5	186.9	279.2
Pr	30.17	24.22	23.52	26.72	29.24	23.8		23.21	14.6	25.99	23.17	24.98		22.66	36.18	45.96		33.29	22.4	24.17	27.93
Nd	103.7	93.65	81.05	91.33	101.8	88.07		93.67	60	102.6	84.4	99.6		88.87	143.3	176.6		130.4	89.25	85.06	112.1
Sm	19.93	14.69	14.41	15.42	18.37	17.11		15.28	9.55	16.26	15.96	17.39		15.09	25.58	33.89		21.85	14.77	15.66	18.23
Eu	1.825	1.734	1.743	2.041	2.255	0.61		3.65	1.91	3.482	3.256	2.714		1.021	1.402	1.842		0.674	1.855	2.151	1.357
Gd	18.06	12.87	11.59	12.22	14.64	13.88		13.88	8.21	14.05	12.95	15.52		13.69	23.26	27.98		19.84	12.74	12.69	15.75
Tb	3.157	2.004	1.87	1.929	2.367	2.339		2.135	1.335	2.121	2	2.53		2.217	3.82	4.368		3.244	2.049	2.013	2.389
Dy	20.29	11.67	11.33	11.5	14.36	14.2		12.04	7.92	12	11.84	15.02		13.18	22.07	25.36		18.93	12.03	12.02	13.33
Ho	4.271	2.268	2.286	2.334	2.882	2.855		2.337	1.587	2.338	2.325	2.966		2.668	4.355	5.044		3.85	2.379	2.369	2.522
Er	12.86	6.61	6.75	6.84	8.44	8.33		6.5	4.5	6.47	6.79	8.41		7.64	12.24	14.51		10.99	6.87	6.98	6.86
Tm	1.868	1.031	0.9866	0.9877	1.217	1.372		0.9808	0.6657	0.9678	0.9733	1.293		1.18	1.862	2.272		1.715	1.07	1.013	1.046
Yb	12.03	6.64	6.59	6.47	8.17	8.74		5.98	4.23	6.13	6.52	7.93		7.4	11.49	14.43		10.69	6.77	6.83	6.61
Lu	1.654	0.966	0.969	0.946	1.173	1.254		0.901	0.617	0.924	0.948	1.151		1.088	1.693	2.128		1.597	1.022	1.006	1.019
Hf	27.83	18.96	18.03	18.47	22.08	24.59		14.4	14.87	15.74	16.27	22.25		18.04	30.82	35.21		27.09	19.22	17.96	20.14
Ta	8.326	7.622	6.702	6.823	7.625	10.86		6.012	5.567	6.076	5.929	8.822		6.934	11.14	16.74		10.17	6.883	6.456	7.057
W	2.118	71.42	2.387	1.642	2.258	0.1564		63.17	53.37	59.64	2.105	93.88		115.1	87.12	0.1595		84.4	75.72	1.926	69.25
Tl	N/A	0	N/A	N/A	N/A	0.942		0	0	0	N/A	0		0	0	1.039		0	0	N/A	0
Pb	11.5	18.32	11.03	8.36	8.36	22.14		9.75	6.6	9.24	17.19	5.03		5.6	3.2	24.75		4.55	10.82	6.71	6.49
Th	42.64	21.09	18.92	20.27	23.2	25.46		15.73	1.8	17.1	16.68	22.88		18.43	30.53	32.79		24.8	6.94	18.53	9.52
U	7.35	5.12	6.65	4.58	4.86	6.39		3.57	2.74	3.81	4.27	4.75		4.39	6.14	7.86		6.23	3.94	4.66	3.97
LOI = Loss on ignition.
Eu/Eu*=EuN/[(SmN+GdN)^1/2]. N= chondrite normalized, and PM= primitive mantle normalized to values of Sun and McDonough (1989).
Ba/Ba*=Ba[PM]/[(Rb[PM] +Th[PM])^1/2]. N= chondrite normalized, and PM= primitive mantle normalized to values of Sun and McDonough (1989).
ASI=Al/Ca–1.67P+Na+K.
Fe*=FeOtot/(FeOtot+MgO).
The calculation of Eu/Eu* and Ba/Ba* were performed follows Taylor and McLennan, 1985; Frost et al., 2002
Refs:
Frost, C., Frost, B., Bell, J., Chamberlain, K., 2002. The relationship between A-type granites and residual magmas from anorthosite: evidence from the northern Sherman batholith, Laramie Mountains, Wyoming, USA. Precambrian Research, 119, 1-4, 45–71. doi:10.1016/s0301-9268(02)00117-1.
Taylor, S.R., McLennan, S.M., 1985. The continental crust: Its composition and evolution. United States.
Sun, S.S., McDonough, W.F., 1989. Chemical and isotopic systematics of oceanic basalts: implications for mantle composition and processes. In: Saunders, A.D., Norry, M.J. (Editor-in-chiefs), Magmatism in the Ocean Basins. Geological Society of London Special Publication, 42, 313–435.

## Sheet: Normative mineralogy_CIPW
Table S4b. Nomative mineralgy of the Permian granitic rocks in Phan Si Pan - Tu Le region, NW Vietnam
Samples/Minerals	Q	C	Or	Ab	An	Ne	Di	Hy	Ol	Il	Ap	Ac	Ns	Wo	Hm	Tn	Ru	Pf
Permian Muong Hum granites
PSP2b	27.2301	0.177643	38.3777	29.3946	0.398976	0	0	0.900838	0	0.114692	0.0709918	0	0	0	2.85041	0	0.227996	0
PSP2c	24.6525	0.300501	30.4343	39.4122	0.894788	0	0	1.12407	0	0.127353	0.092229	0	0	0	2.87151	0	0.336922	0
PSP2d	22.3446	0.170571	36.9114	35.4766	0.731773	0	0	1.0995	0	0.116772	0.0993512	0	0	0	3.17892	0	0.330653	0
PSP2f	22.3942	0.47562	34.701	37.4994	0.700043	0	0	1.24637	0	0.138015	0.0875308	0	0	0	2.86755	0	0.311444	0
PSP2g	24.1453	0.107442	35.7028	33.8244	1.3719	0	0	1.07147	0	0.110334	0.104017	0	0	0	3.19689	0	0.341802	0
MH-32	46.4667	0.983764	31.451	19.8088	0.301057	0	0	0.707377	0	0.0531466	0.00236854	0	0	0	2.329	0	0.171853	0
Permian Nam Xe - Tam Duong granites
PSP27	14.5561	0	28.7145	43.952	1.6525	0	0	2.52773	0	0.145515	0.425287	0	0	0	5.93032	1.41789	0.132923	0
PSP28a	17.0029	0	21.8048	51.1538	2.4446	0	0	0.970501	0	0.0714795	0.288107	0	0	0	4.53822	0.624877	0.356297	0
PSP28b	15.9244	0	26.0995	46.2879	1.92568	0	0	2.00567	0	0.105279	0.342507	0	0	0	5.58321	0.73346	0.334775	0
PSP28c	17.1326	0	25.5753	45.1713	1.75489	0	0.56874	1.5255	0	0.204308	0.330886	0	0	0	5.69205	1.47075	0	0
PSP28d	22.5615	0	25.9416	41.1646	2.38366	0	0.666395	0.931622	0	0.335254	0.236408	0	0	0	4.96364	0.987564	0	0
Permian Tu Le rhyolites
PSP24	38.1891	0.603768	30.7715	25.307	1.09218	0	0	0.480442	0	0.0591834	0.0117749	0	0	0	2.75911	0	0.235122	0
PSP29a	22.401	0	29.8486	40.0838	0.341057	0	1.51505	0	0	0.293395	0.185785	0	0	0.166488	4.1632	0.890742	0	0
PSP29b	24.1359	0	29.8958	32.9285	3.90995	0	1.31765	0	0	0.258589	0.185877	0	0	1.30364	3.74336	0.877364	0	0
PSP30	35.4326	1.24969	42.8978	18.0151	0	0	0	0.319875	0.208726	0.0296598	0.0472081	0	1.49607	0	5.85964	0	0.302196	0
Permian Phan Si Pan granites (Phu Sa Phin granites)
PSP31	32.9283	0	28.2442	35.1784	0	0	0.433422	0	0	0.15667	0.016512	0.115376	0	0.575884	2.24473	0.28523	0	0
PSP32	36.9518	0	27.571	30.3582	0	0	0.230512	0	0	0.118779	0.00472638	1.54063	0	0.026417	3.02344	0.445584	0	0
FSP-01	36.935	0	26.3569	31.0123	0	0	0.491643	0.0136873	0	0.150936	0.00236854	3.03362	0	0	2.83445	0.599045	0	0
Quartz (Q)
Corundum(C)
Orthoclase(Or)
Albite(Ab)
Anorthite(An)
Nepheline(Ne)
Diopside(Di)
Hypersthene(Hy)
Olivine(Ol)
Magnetite(Mt)
Ilmenite(Il)
Apatite(Ap)
Acmite(Ac)
Leucite(Lc)
K-Metasilicate(Ks)
Na-Metasilicate(Ns)
Di-CaSilicate(Cs)
Kaliophilite(Kp)
Wollastonite(Wo)
Hematite(Hm)
Titanite(Tn)
Rutile(Ru)
Perovskite(Pf)
Calcite(Cc)
Pyrite(Py)
Chromite(Cm)
Fluorite(Fr)
Zircon(Z)
